# Supplementary material
Source: MDPI journal article supplement (https://www.mdpi.com/2036-7503/15/4/52)
Supplement: s1 [file s1]

# Supplementary File

## Exploring Missed Nursing Care in the NICU: Perspectives of NICU Nurses in Saudi Arabia's Eastern Health Cluster

Table 1S, 2S, 3S, 4S, 5S and 6S presents the study participants responses in frequency and percentage to the different items of the study dimensions including assessment (Table1S), intervention (Table 2S), planning (Table 3S), communication (Table 4S), materials resources (Table 5S) and labor resources (Table 6S).

Table 1S: Assessment

| Item                                                     | Never missed | Rarely missed | Occasionally missed | Frequently missed | Always missed |
|----------------------------------------------------------|--------------|---------------|---------------------|-------------------|---------------|
| Full documentation of all necessary data                 | 42 (27.8%)   | 65 (43%)      | 24 (15.9%)          | 19 (12.6%)        | 1 (0.7%)      |
| IV site care and assessment according to hospital policy | 72 (47.7%)   | 46 (30.5%)    | 15 (9.9%)           | 15 (9.9%)         | 3 (2%)        |
| Re-calculated intravenous infusion rate                  | 87 (57.6%)   | 32 (21.2%)    | 21 (13.9%)          | 9 (6%)            | 2 (1.3%)      |
| Monitoring intake/output                                 | 73 (48.3%)   | 45 (29.8%)    | 19 (12.6%)          | 11 (7.3%)         | 3 (2%)        |
| Vital signs assessed as policy\ patient condition        | 95 (62.9%)   | 33 (21.9%)    | 18 (11.9%)          | 5 (3.3%)          | 0             |
| Focused reassessment according to patient condition      | 82 (54.3%)   | 41 (27.2%)    | 22 (14.6%)          | 5 (3.3%)          | 1 (0.7%)      |
| Bedside glucose monitoring as ordered                    | 96 (63.6%)   | 39 (25.8%)    | 13 (8.6%)           | 2 (1.3%)          | 1 (0.7%)      |
| Patient assessments performed each shift                 | 93 (61.6%)   | 35 (23.2%)    | 20 (13.2%)          | 2 (1.3%)          | 1 (0.7%)      |

Table 2S: Interventions

| Item                                                                      | Never missed | Rarely missed | Occasionally missed | Frequently missed | Always missed |
|---------------------------------------------------------------------------|--------------|---------------|---------------------|-------------------|---------------|
| Assess effectiveness of medications                                       | 82 (54.3%)   | 42 (27.8%)    | 21 (13.9%)          | 3 (2%)            | 3 (2%)        |
| PRN medication orders acted -on within five minutes                       | 75 (49.7%)   | 50 (33.1%)    | 18 (11.9%)          | 6 (4%)            | 2 (1.3%)      |
| Medications administered within 30 minutes before or after scheduled time | 77 (51%)     | 60 (39.7%)    | 9 (6%)              | 2 (1.3%)          | 3 (2%)        |

|                                                                                                    |             |            |            |           |           |
|----------------------------------------------------------------------------------------------------|-------------|------------|------------|-----------|-----------|
| Skin to skin contact (kangaroo care)                                                               | 78 (51.7%)  | 21 (13.9%) | 30 (19.9%) | 7 (4.6%)  | 15 (9.9%) |
| Response to sound /light alarm of medical devices                                                  | 82 (54.3%)  | 38 (25.2%) | 18 (11.9%) | 8 (5.3%)  | 5 (3.3%)  |
| Emotional Support to patient and/or family                                                         | 87 (57.6%)  | 32 (21.2%) | 21 (13.9%) | 10 (6.6%) | 1 (0.7%)  |
| Assist mother with breast feeding                                                                  | 88 (58.3%)  | 33 (21.9%) | 16 (10.6%) | 12 (7.9%) | 2 (1.3%)  |
| Assess needs according to NIDCAP(Newborn Individualized Developmental Care and Assessment Program) | 76 (50.3%)  | 36 (23.8%) | 25 (16.6%) | 11 (7.3%) | 3 (2%)    |
| Incubator care                                                                                     | 86 (57%)    | 37 (24.5%) | 17 (11.3%) | 6 (4%)    | 5 (3.3%)  |
| Turning patient every two hours                                                                    | 81 (53.6%)  | 44 (29.1%) | 14 (9.3%)  | 11 (7.3%) | 1 (0.7%)  |
| Mouth Care                                                                                         | 77 (51%)    | 44 (29.1%) | 14 (9.3%)  | 12 (7.9%) | 4 (2.6%)  |
| Eye Care                                                                                           | 89 (58.9%)  | 33 (21.9%) | 17 (11.3%) | 11 (7.3%) | 1 (0.7%)  |
| Umbilical care                                                                                     | 79 (52.3%)  | 44 (29.1%) | 16 (10.6%) | 8 (5.3%)  | 4 (2.6%)  |
| Warming the milk before feeding the patient                                                        | 96 (63.6%)  | 32 (21.2%) | 13 (8.6%)  | 4 (2.6%)  | 6 (4%)    |
| Patient bathing/skin care                                                                          | 92 (60.9%)  | 38 (25.2%) | 14 (9.3%)  | 6 (4%)    | 1 (0.7%)  |
| Dressing /wound care                                                                               | 95 (62.9%)  | 41 (27.2%) | 12 (7.9%)  | 3 (2%)    | 0         |
| Check /Change diaper                                                                               | 107 (70.9%) | 31 (20.5%) | 11 (7.3%)  | 2 (1.3%)  | 0         |

Table 35: Planning

| Item             | Never missed | Rarely missed | Occasionally missed | Frequently missed | Always missed |
|------------------|--------------|---------------|---------------------|-------------------|---------------|
| Parents teaching | 79 (52.3%)   | 46 (30.5%)    | 18 (11.9%)          | 8 (5.3)           | 0             |

|                                                                       |            |            |            |          |   |
|-----------------------------------------------------------------------|------------|------------|------------|----------|---|
| Participating in care decision (multidisciplinary team) whenever held | 71 (47%)   | 51 (33.8%) | 20 (13.2%) | 9 (6%)   | 0 |
| Ensuring discharge planning                                           | 91 (60.3%) | 40 (26.5%) | 16 (10.6%) | 4 (2.6%) | 0 |

Table 4S: Communication

| Item                                                                             | Not a reason for missed care | Minor reason | Moderate reason | Significant |
|----------------------------------------------------------------------------------|------------------------------|--------------|-----------------|-------------|
| Unbalanced patient assignments                                                   | 26 (17.2%)                   | 35 (23.2%)   | 31 (20.5%)      | 59 (39.1%)  |
| Inadequate hand-off from previous shift                                          | 27 (17.9%)                   | 45 (29.8%)   | 43 (28.5%)      | 36 (23.8%)  |
| Other departments did not provide the care needed                                | 40 (26.5%)                   | 40 (26.5%)   | 35 (23.2%)      | 36 (23.8%)  |
| Lack of back up support from team members                                        | 26 (17.2%)                   | 55 (36.4%)   | 32 (21.2%)      | 38 (25.2%)  |
| Tension or communication breakdowns with other ancillary/support departments     | 36 (23.8%)                   | 47 (31.1%)   | 30 (19.9%)      | 38 (25.2%)  |
| Tension or communication breakdowns within the nursing team                      | 37 (24.5%)                   | 41 (27.2%)   | 32 (21.2%)      | 41 (27.2%)  |
| Tension or communication breakdowns with the medical staff                       | 35 (23.2%)                   | 33 (21.9%)   | 36 (23.8%)      | 47 (31.1%)  |
| Nurse reliver (during break time) did not communicate that care was not provided | 33 (21.9%)                   | 36 (23.8%)   | 34 (22.5%)      | 48 (31.8%)  |

Table 5S: Material Resources

| Item                                          | Not a reason for missed care | Minor reason | Moderate reason | Significant |
|-----------------------------------------------|------------------------------|--------------|-----------------|-------------|
| Medications were not available when needed    | 20 (13.2%)                   | 43 (28.5%)   | 30 (19.9%)      | 58 (38.4%)  |
| Supplies/ equipment not available when needed | 15 (9.9%)                    | 33 (21.9%)   | 22 (14.6%)      | 81 (53.6%)  |
| Supplies/ equipment not functioning properly  | 17 (11.3%)                   | 29 (19.2%)   | 20 (13.2%)      | 85 (56.3%)  |

Table 6S: Labor Resources

| Item                                                            | Not a reason for missed care | Minor reason | Moderate reason | Significant |
|-----------------------------------------------------------------|------------------------------|--------------|-----------------|-------------|
| Inadequate number of staff                                      | 18 (11.9%)                   | 23 (15.2%)   | 26 (17.2%)      | 84 (55.6%)  |
| Urgent patient situations                                       | 24 (15.9%)                   | 30 (19.9%)   | 24 (15.9%)      | 73 (48.3%)  |
| Unexpected rise in patient volume and/or acuity on the unit     | 21 (13.9%)                   | 26 (17.2%)   | 30 (19.9%)      | 74 (49%)    |
| Insufficient numbers of Health care assistant and/or ward clerk | 27 (17.9%)                   | 29 (19.2%)   | 20 (13.2%)      | 75 (49.7%)  |

Table 7S: Regression (n= 151), testing 12 sociodemographic variables in predicting missed nursing care ,

| Characteristics                                                         | OR    | 95% CI          | p-value |
|-------------------------------------------------------------------------|-------|-----------------|---------|
| <i>Age</i><br>34 and younger vs. older than 34                          | 1.169 | (0.331-4.121)   | 0.80    |
| <i>Health organization</i><br>Dammam vs Jubail                          | 1.990 | (0.457 - 8.658) | 0.33    |
| Qatif vs. Jubail                                                        | 1.208 | (0.364 - 4.012) | 0.75    |
| <i>Education level</i><br>Diploma vs. bachelor                          | 2.064 | (0.746 -5.715)  | 0.16    |
| <i>Professional experience</i><br>6 years and more vs. 5 years and less | 2.490 | (0.667 - 9.302) | 0.17    |

|                                                                                               |       |                  |        |
|-----------------------------------------------------------------------------------------------|-------|------------------|--------|
| <i>Current hospital experience</i><br><i>5 and less vs. 6 and more</i>                        | 1.444 | (0.458 - 4.559)  | 0.53   |
| <i>Shift</i><br><i>Regular vs. rotation</i>                                                   | 1.404 | (0.505 – 3.903)  | 0.51   |
| <i>Weekend days worked per month</i><br><i>Three and f vs. one and two</i>                    | 1.223 | (0.439 - 3.407)  | 0.70   |
| <i>Avrage days off per week</i><br><i>More two vs. two</i>                                    | 1.132 | (0.482 - 2.658)  | 0.77   |
| <i>Days or shifts absent in the past three months</i><br><i>One and less vs. two and more</i> | 2.299 | (1.035 - 5.105)  | 0.04   |
| <i>Satisfaction with the load of work in the unit</i><br><i>50% and less vs. More than 50</i> | 2.188 | (0.941 - 5.089)  | 0.06   |
| <i>Intention to leave current position</i><br><i>In 6 months vs. no plan</i>                  | 5.792 | (2.495 - 13.445) | 0.0001 |
